# Supplementary material for: Efficient charge-transport in hybrid lead iodide perovskite solar cells
Source: Royal Society of Chemistry journal article supplement (doi:10.1039/c5dt02388b), 2015-01-01
Supplement: c5dt02388b1.pdf [file c5dt02388b1.pdf]

## Supporting Information

### Charge-transport efficiently in hybrid lead iodide perovskite solar cells

Jinjin Zhao,<sup>†§\*</sup> Peng Wang,<sup>‡†</sup> Liyu Wei,<sup>†</sup> Zhenghao Liu<sup>†</sup>, Xueqian Fang<sup>†</sup>,  
Xianglin Liu<sup>†</sup>, Deliang Ren<sup>†‡</sup> and Yaohua Mai<sup>‡\*</sup>

<sup>†</sup>*School of Materials Science and Engineering, Shijiazhuang Tiedao University, 17 Northeast, Second Inner Ring, Shijiazhuang, 050043, China; E-mail: jinjinzhao2012@163.com.*

<sup>‡</sup>*Hebei Key Lab of Optic-electronic Information and Materials, The College of Physics Science and Technology, Hebei University, Baoding 071002, China, E-mail: yaohuamai@163.com.*

<sup>§</sup>*The Key Laboratory for Health Monitoring and Control of Large Structures, Hebei province, 17 Northeast, Second Inner Ring, Shijiazhuang, 050043, China.*

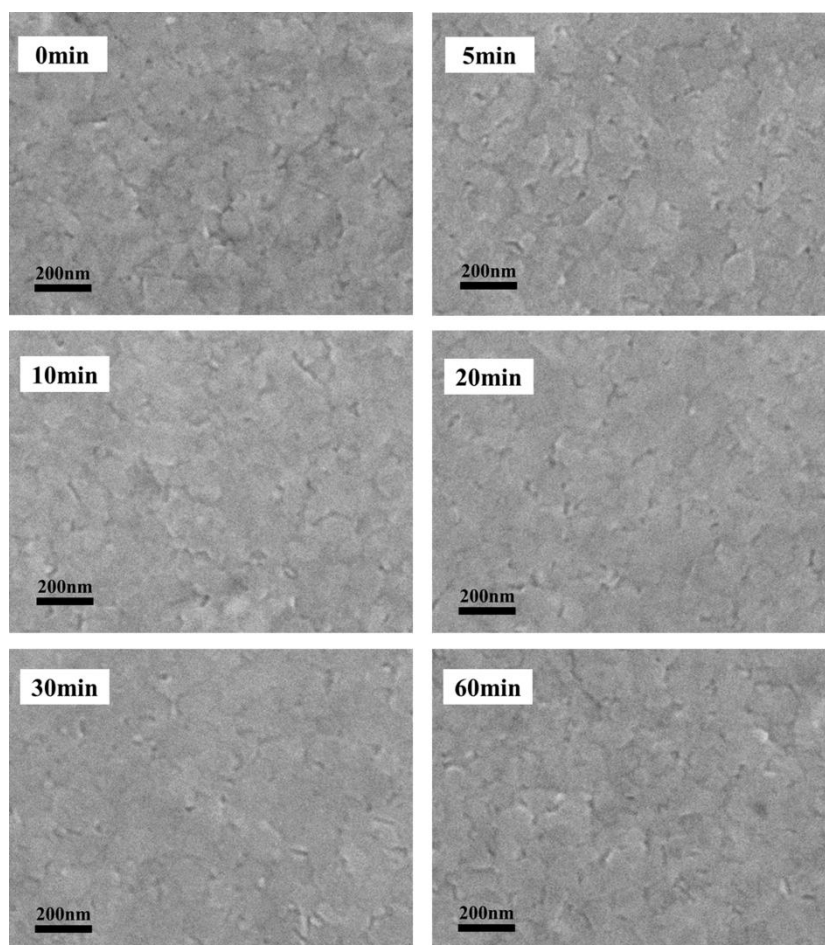

Fig. S1 SEM images of PbI<sub>2</sub> films deposited on the mesoporous TiO<sub>2</sub> films adjusted by different the TiCl<sub>4</sub> processing times (0min, 5min, 10min, 20min, 30min, and 60min, respectively).

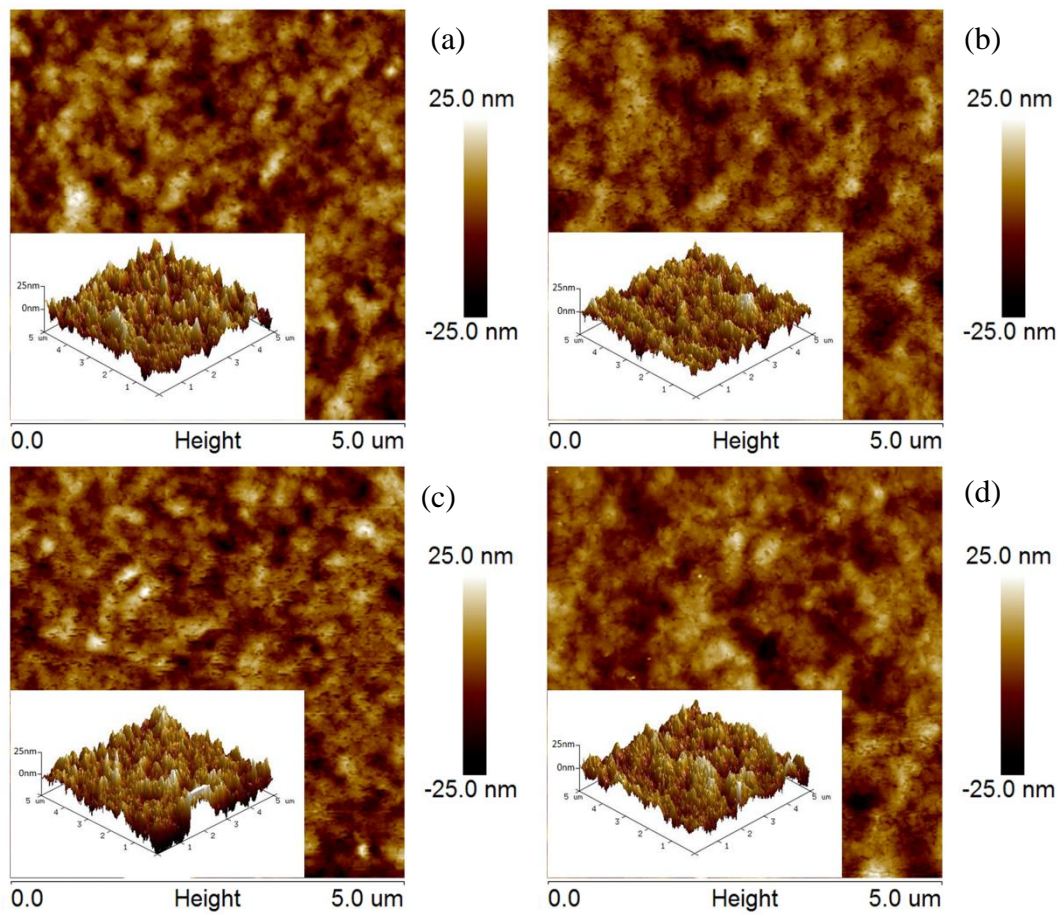

(e)

| Device                         | 0min | <b>30min</b> | 60min | 120min |
|--------------------------------|------|--------------|-------|--------|
| Root mean square Roughness(nm) | 6.07 | <b>5.97</b>  | 8.94  | 6.26   |

Fig. S2 Tapping-mode AFM height images (a-d) of  $\text{PbI}_2$  films deposited on mesoporous  $\text{TiO}_2$  films by different  $\text{TiCl}_4$  processing times at 0min, 30min, 60min and 120min, respectively. (Inset: the corresponding 3D topographic image). (e) Surface roughness of the corresponding  $\text{PbI}_2$  films.

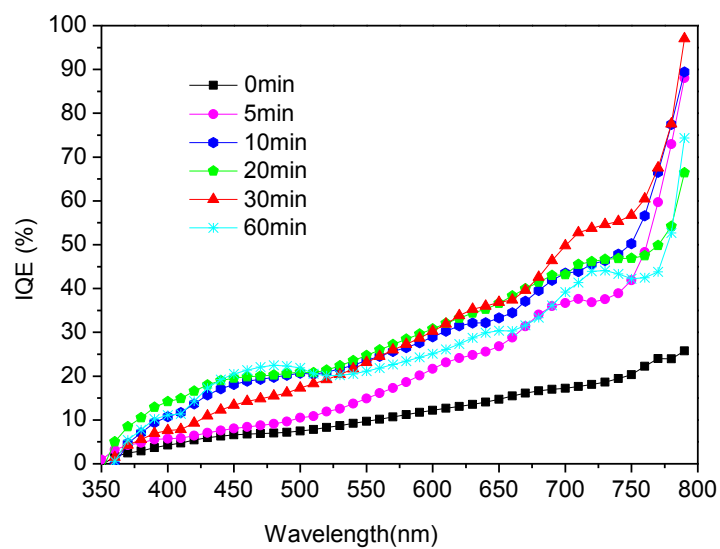

Fig. S3 Internal quantum efficiency (IQE) of perovskite solar cell with controlled  $\text{TiCl}_4$  solution treatment. All the curves are fitted with the function  $\text{IQE} = \text{EQE} / (1 - R - T)$ , (R is the UV-Vis light reflectivity of perovskite solar cells, T is the light transmittance of perovskite solar cells, EQE is External quantum efficiency.)

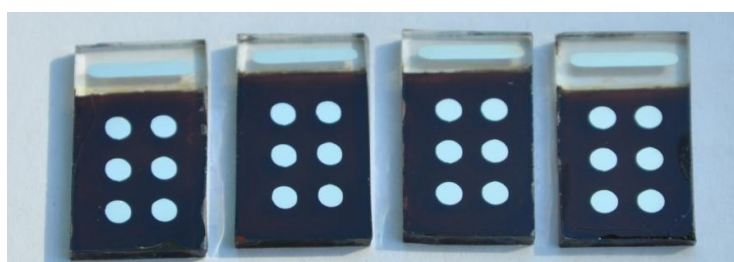

Fig. S4 The Photos of Perovskite solar cells with 30min  $\text{TiCl}_4$  processing
